# Supplementary material
Source: publisher figshare collection journal article supplement (https://acs.figshare.com/ndownloader/files/8435198)
Supplement: Supplementary file 1 [file 8435198]

## Supporting Information for

# Facile Approach to Preparing a Vanadium Oxide Hydrate Layer as a Hole-Transport Layer for High-Performance Polymer Solar Cells

Hailin Cong,<sup>†,‡,§</sup> Dongwei Han,<sup>†,‡,§</sup> Bingbing Sun,<sup>‡</sup> Dongying Zhou,<sup>‡</sup> Chen Wang,<sup>‡</sup> Ping Liu,<sup>‡</sup> and Lai Feng<sup>\*,‡</sup>

<sup>†</sup>*Laboratory for New Fiber Materials and Modern Textile, Growing Base for State Key Laboratory, College of Chemical Engineering, Qingdao University, Qingdao, 266071, China*

<sup>‡</sup>*Key Laboratory of Advanced Carbon Materials and Wearable Energy Technologies of Jiangsu Province, Soochow Institute for Energy and Material Innovations, College of Physics, Optoelectronics and Energy, Soochow University, Suzhou 215006, China*

<sup>§</sup>These authors contribute equally to this work.

\*Corresponding author (Tel: +86 512 65223650; E-mail address:

fenglai@suda.edu.cn (Lai Feng)).

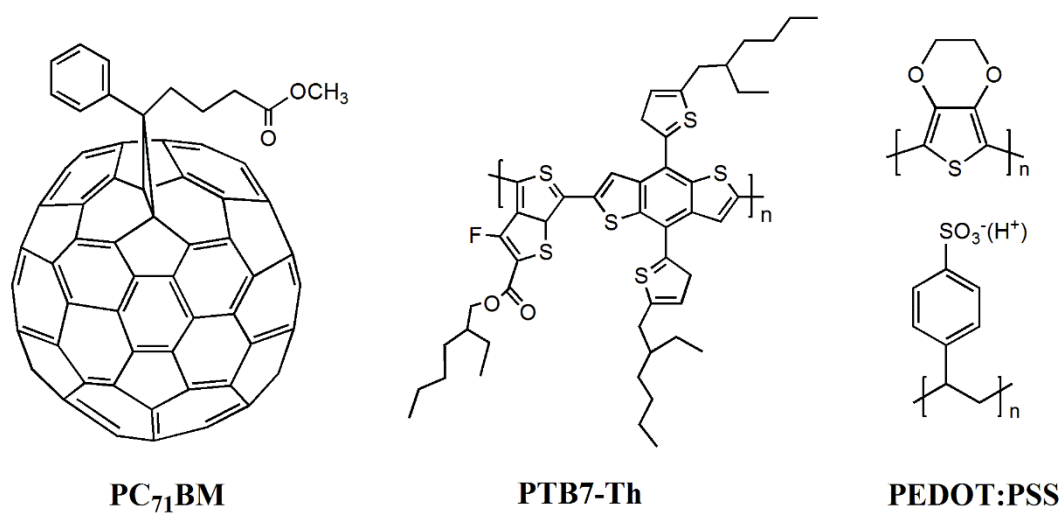

**Figure S1.** Schematic molecule structures of PC<sub>71</sub>BM, PTB7-Th, PEDOT:PSS.

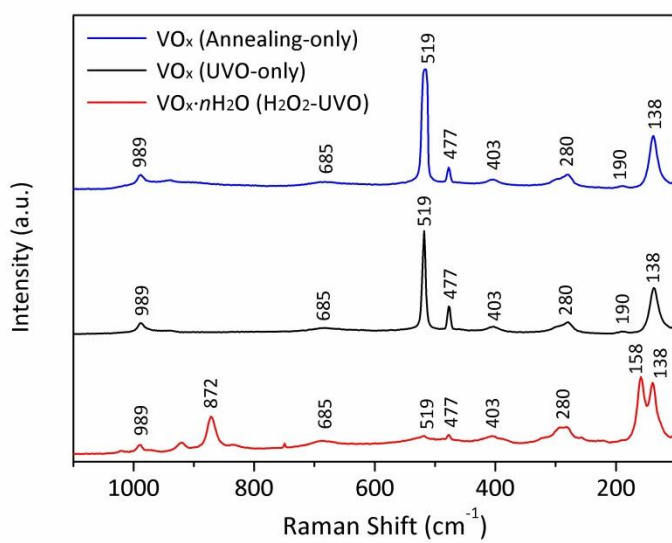

**Figure S2.** Micro-Raman spectra of the as-prepared VO<sub>x</sub>·*n*H<sub>2</sub>O (H<sub>2</sub>O<sub>2</sub>-UVO) and VO<sub>x</sub> layers.

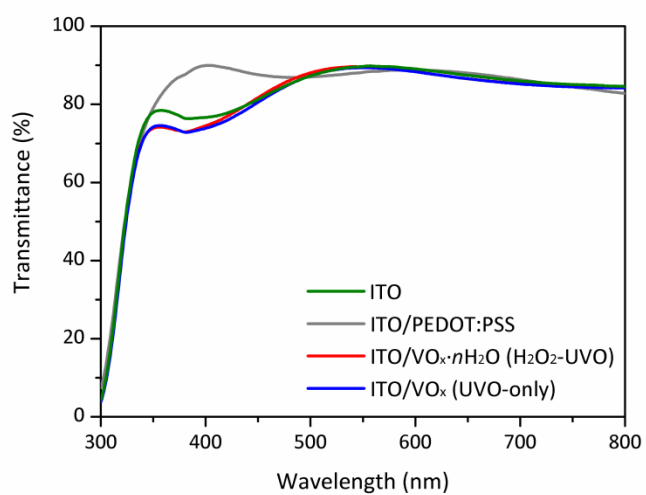

**Figure S3.** Optical transmittance spectra of the bare ITO, PEDOT:PSS and  $\text{VO}_x \cdot n\text{H}_2\text{O}$  ( $\text{H}_2\text{O}_2$ -UVO) and  $\text{VO}_x$  (UVO-only) layers.

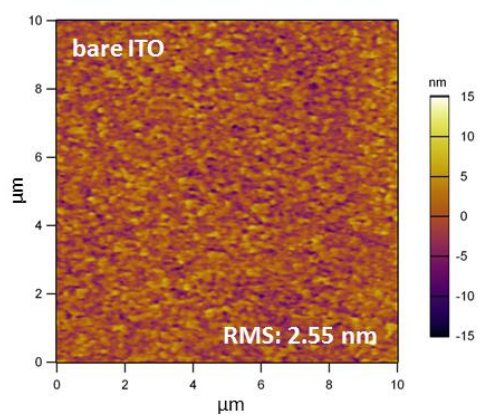

**Figure S4.** AFM height image of the bare ITO. The scan size is  $10\ \mu\text{m} \times 10\ \mu\text{m}$ .

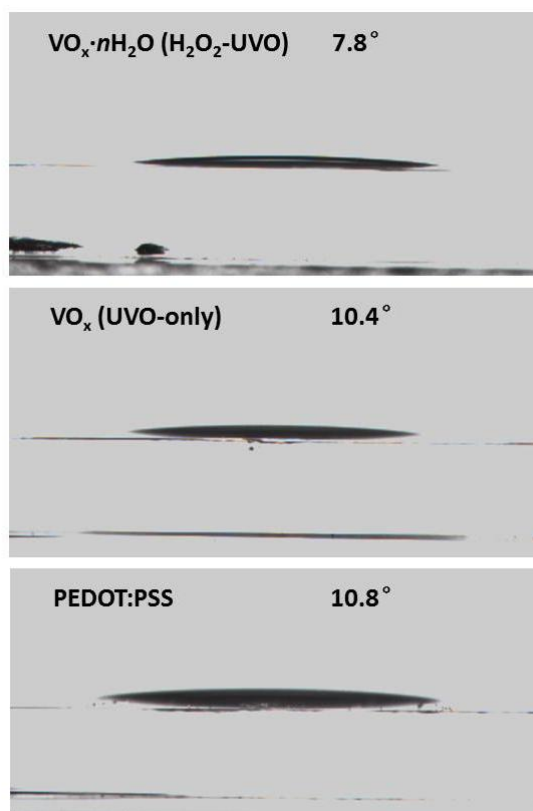

**Figure S5** Measured contact angle between a drop of 1,2-dichlorobenzene and the HTL. VO<sub>x</sub>·*n*H<sub>2</sub>O (H<sub>2</sub>O<sub>2</sub>-UVO), VO<sub>x</sub> (UVO-only), and PEDOT:PSS layers from top to bottom, respectively.

**Table S1.** Device performance of the PSCs (based on PTB7-th:PC<sub>71</sub>BM) with VO<sub>x</sub> *n*H<sub>2</sub>O (H<sub>2</sub>O<sub>2</sub>-UVO) layer with varied concentration.

| precursor | $V_{oc}$ (V) | $J_{sc}$ (mA/cm <sup>2</sup> ) | $FF$ (%) | PCE (%) |
|-----------|--------------|--------------------------------|----------|---------|
| 1.0 mg/mL | 0.796        | 16.49                          | 68.2     | 8.11    |
| 1.5 mg/mL | 0.790        | 14.69                          | 63.6     | 7.38    |
| 2.0 mg/mL | 0.772        | 15.15                          | 61.4     | 7.18    |

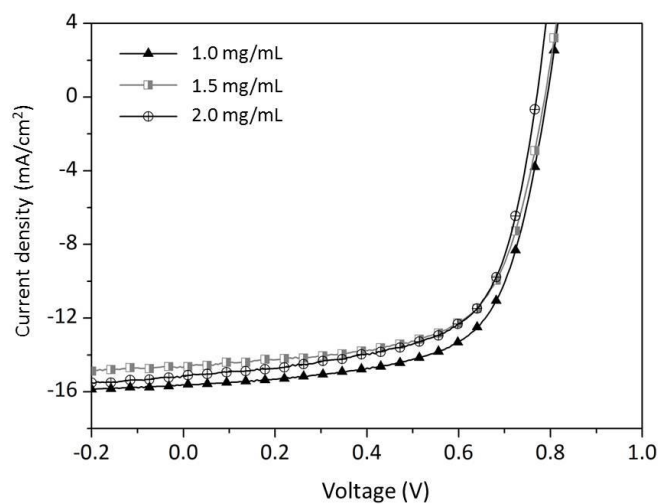

**Figure S6.**  $J$ – $V$  curves of the PSCs (based on PTB7-th:PC<sub>71</sub>BM) with VO<sub>x</sub> *n*H<sub>2</sub>O (H<sub>2</sub>O<sub>2</sub>-UVO) layer with varied concentration under 1 sun illumination condition.

**Table S2.** Device performance of the PSCs based on P3HT:PC<sub>61</sub>BM with different HTLs.<sup>a</sup>

| device | hole transport layer                                                    | $V_{oc}$ (V) | $J_{sc}$ (mA/cm <sup>2</sup> ) | FF (%) | PCE (%) <sup>b</sup> |
|--------|-------------------------------------------------------------------------|--------------|--------------------------------|--------|----------------------|
| A'     | PEDOT:PSS                                                               | 0.647        | 7.90                           | 62.26  | 3.18(3.32)           |
| B'     | VO <sub>x</sub> ·nH <sub>2</sub> O (H <sub>2</sub> O <sub>2</sub> -UVO) | 0.638        | 8.12                           | 62.24  | 3.24(3.32)           |
| C'     | VO <sub>x</sub> (UVO-only)                                              | 0.630        | 7.75                           | 60.98  | 2.98(3.04)           |
| D'     | VO <sub>x</sub> (annealing-only)                                        | 0.637        | 8.14                           | 52.38  | 2.72(2.90)           |

<sup>a</sup>Statistical data achieved from 10 independent devices. <sup>b</sup>The maxima PCEs are in the brackets.

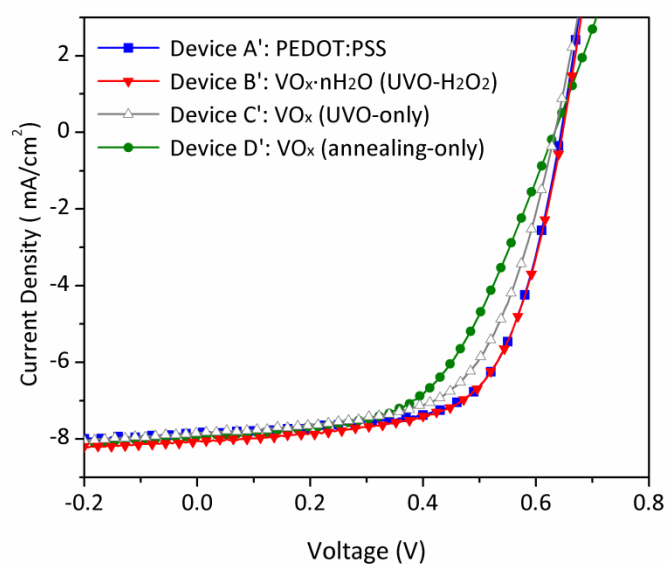

**Figure S7.**  $J$ – $V$  curves of best performing devices based on P3HT:PC<sub>71</sub>BM with different HTLs under 1 sun illumination condition.

### Space charge limited current (SCLC) measurements

The SCLC devices or hole-only devices were fabricated with a configuration of ITO/HTL/PTB7-th:PC<sub>71</sub>BM/MoO<sub>3</sub>/Ag. The SCLC can be written as  $J_{SCLC} = 9\epsilon_0\epsilon_r\mu_h(V-V_{BI})^2/(8L^3)$ : where  $J$  is current density,  $\epsilon_r$  is dielectric constant of the fullerene derivatives (normally a value of 3 is used),  $\epsilon_0$  ( $8.8541878176 \times 10^{-12}$  F/m) is the permittivity of vacuum,  $\mu_h$  is hole carrier mobility,  $L$  is film thickness,  $V = V_{appl} - V_{bi}$ ,  $V_{appl}$  is the applied potential, and  $V_{bi}$  is the built-in potential resulting from work function difference between two electrodes (in this device,  $V_{bi} = 0.6$  V)<sup>1</sup>. To evaluate the  $\mu_h$  value, the log  $J$ - $V$  line obtained in dark was fitted using a function of  $y = a + 2x$  and electron mobility ( $\mu_h$ ) was calculated from the y-intercept of the fitting line.

### Reference.

1. Morsli1, M.; Cattin, L.; Bernède, J. C.; Kumar, P.; Chand, S.  $J$ - $V$  Characteristics of Dark and Illuminated Classical and Inverted Organic Solar Cells Based on the CuPc/C<sub>60</sub> Heterojunction. *J. Phys. D: Appl. Phys.* **2010**, *43*, 335103.
